# Supplementary material for: Enhanced photodynamic therapy and fluorescence imaging using gold nanorods for porphyrin delivery in a novel in vitro squamous cell carcinoma 3D model
Source: Royal Society of Chemistry journal article supplement (doi:10.1039/d0tb00810a), 2020-01-01
Supplement: d0tb00810a1.pdf [file d0tb00810a1.pdf]

## Supplementary Information

### **Enhanced photodynamic therapy and fluorescence imaging using gold nanorods for porphyrin delivery in a novel *in vitro* squamous cell carcinoma 3D model**

Fatma Demir Duman,<sup>a,d,\*</sup> Matej Sebek,<sup>b,c</sup> Nguyễn T K Thanh,<sup>b,c</sup> Marilena Loizidou,<sup>a</sup> Kaveh

Shakib,<sup>a</sup> Alexander J. MacRobert<sup>a,\*</sup>

<sup>a</sup>Division of Surgery and Interventional Science, Centre for Nanomedicine and Surgical Theranostics, University College London, Royal Free Campus, Rowland Hill St, London, NW3 2PE, UK

<sup>b</sup>Biophysics Group, Department of Physics and Astronomy, University College London, London, WC1E 6BT, UK

<sup>c</sup>UCL Healthcare Biomagnetic and Nanomaterials Laboratories, 21 Albemarle Street, London W1S 4BS, UK

<sup>d</sup>WestCHEM School of Chemistry, University of Glasgow, Joseph Black Building, University Avenue, Glasgow, G12 8QQ, UK

\* Correspondence: a.macrobot@ucl.ac.uk, fatma.demirduman@glasgow.ac.uk

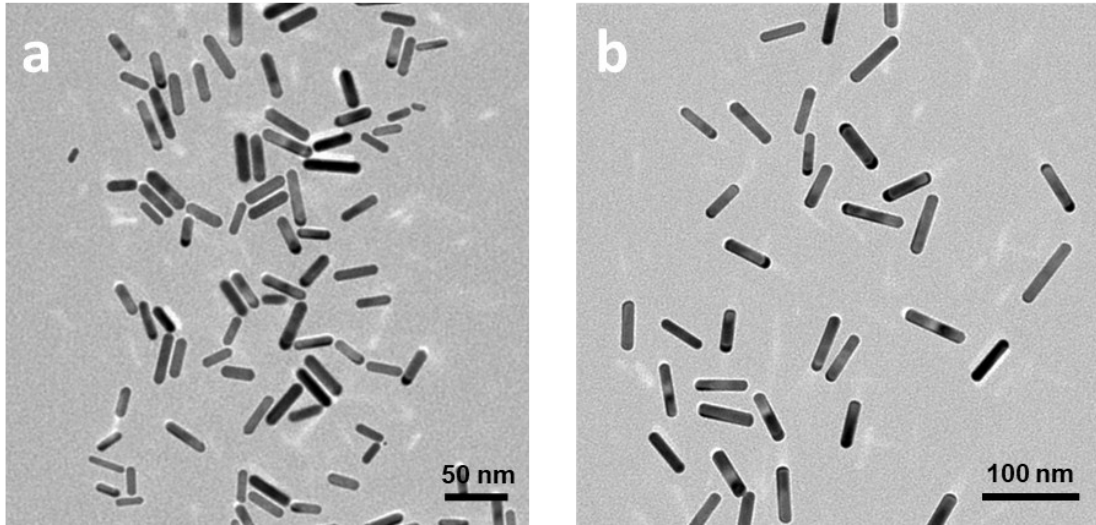

**Fig. S1** TEM images of a) Au NRs and b) PAA-Au NRs.

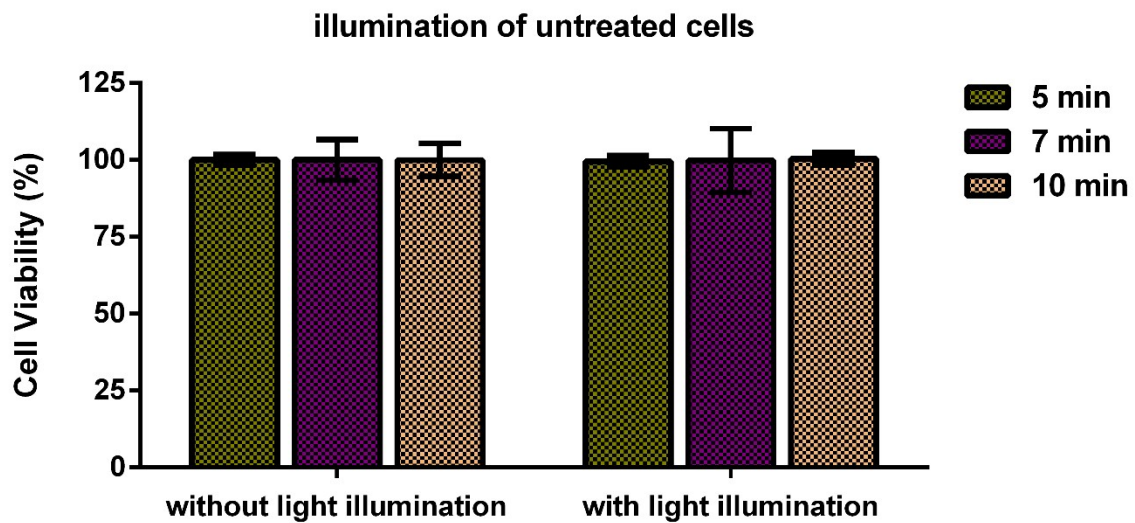

**Fig. S2** The effect of light illumination to cell viability of untreated control cells with the samples. Cells were illuminated for 5, 7 and 10 min with blue LumiSource® flatbed lamp at 420 nm and 7 mW/cm<sup>2</sup> output. Cytotoxicity were measured by MTT assay.

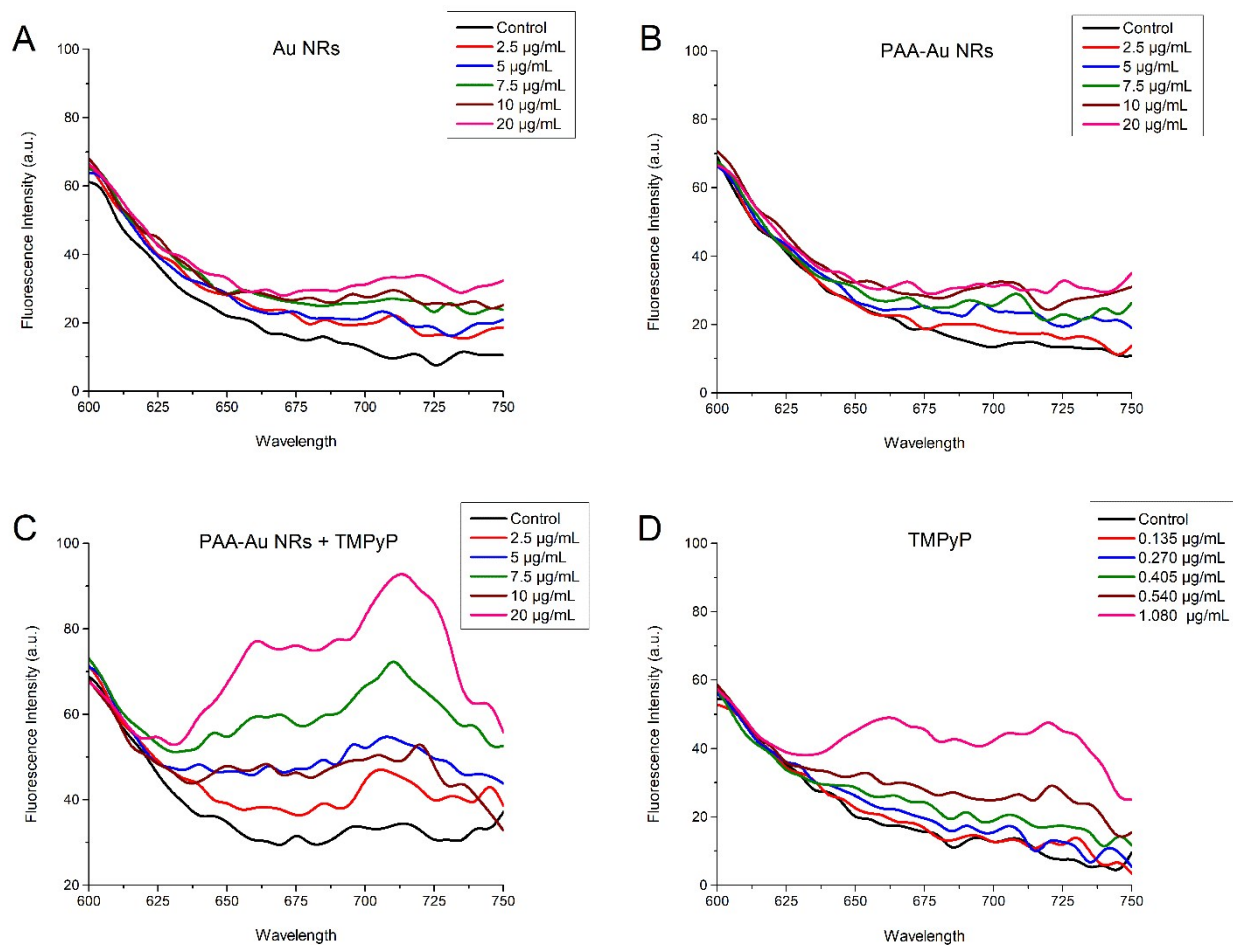

**Fig. S3** Fluorescence spectra of 2D monolayer A431 models incubated with Au, PAA-Au, PAA-Au + TMPyP NRs and equivalent free TMPyP at different concentrations for 24 h, between 600-750 nm ( $\lambda_{exc} = 420$  nm). Control is untreated cells for each panel.

A

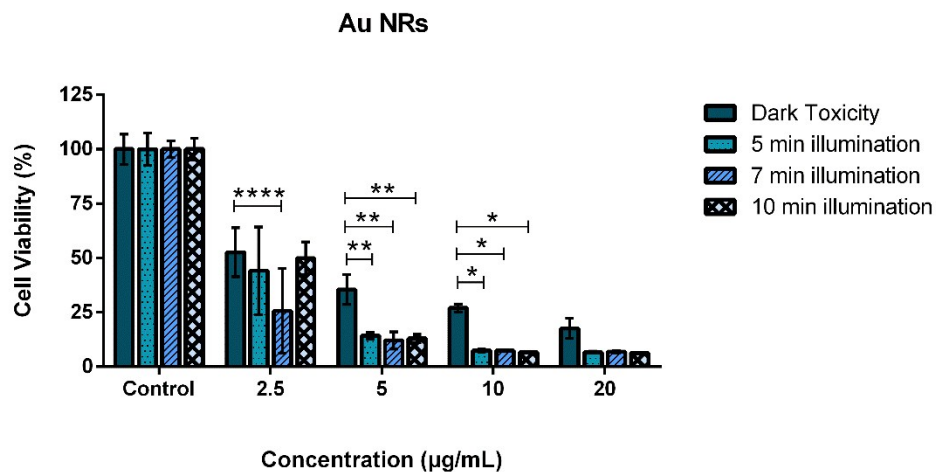

B

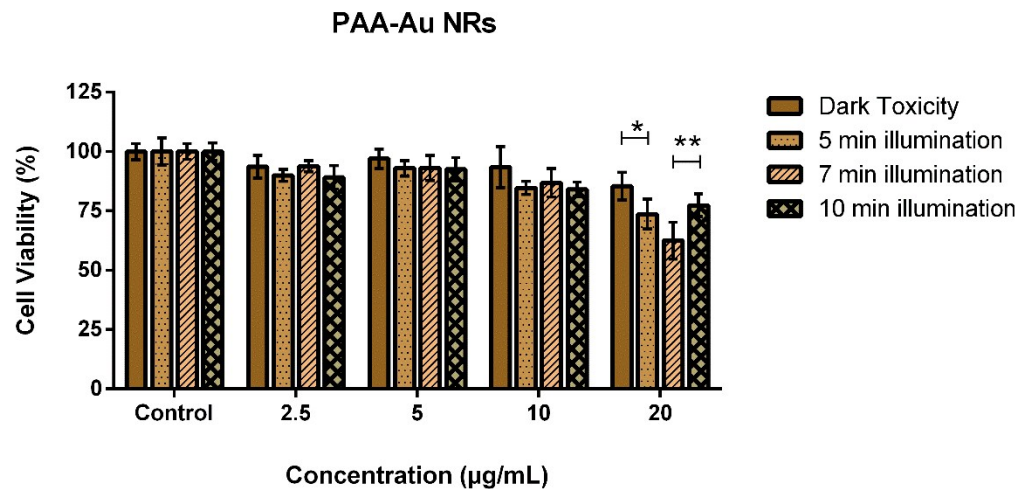

**Fig. S4** Effect of light illumination on the cytotoxicity of in vitro 2D monolayer head and neck squamous cell carcinoma models treated with A) Au and B) PAA-Au NRs. The cytotoxicities were measured by MTT assay. Light illumination were carried out with a blue LumiSource® flatbed lamp at 420 nm and 7 mW/cm<sup>2</sup> output for 5 min, 7 min, and 10 min.
